# Supplementary material
Source: PubMed Central journal article supplement (PMC6956534)
Supplement: supp_RA119.011268_155976_1_supp_423277_q1wgtl.pdf [file supp_RA119.011268_155976_1_supp_423277_q1wgtl.pdf]

The *Plasmodium falciparum* circumsporozoite protein produced in *Lactococcus lactis* is a pure and stable protein that elicits functional antibodies

Susheel K. Singh<sup>1,2</sup>, Jordan Plieskatt<sup>3</sup>, Bishwanath K. Chourasia<sup>1,2</sup>, Vandana Singh<sup>1,2</sup>, Judith M. Bolscher<sup>4</sup>, Koen J. Dechering<sup>4</sup>, Bright Adu<sup>5</sup>, Blanca López-Méndez<sup>6</sup>, Swarnendu Kaviraj<sup>7</sup>, Emily Locke<sup>3</sup>, C. Richter King<sup>3</sup>, Michael Theisen<sup>1,2,\*</sup>

**Supporting information included:**

1. Supplementary Figure S1
2. Supplementary Figure S2
3. Supplementary Figure S3

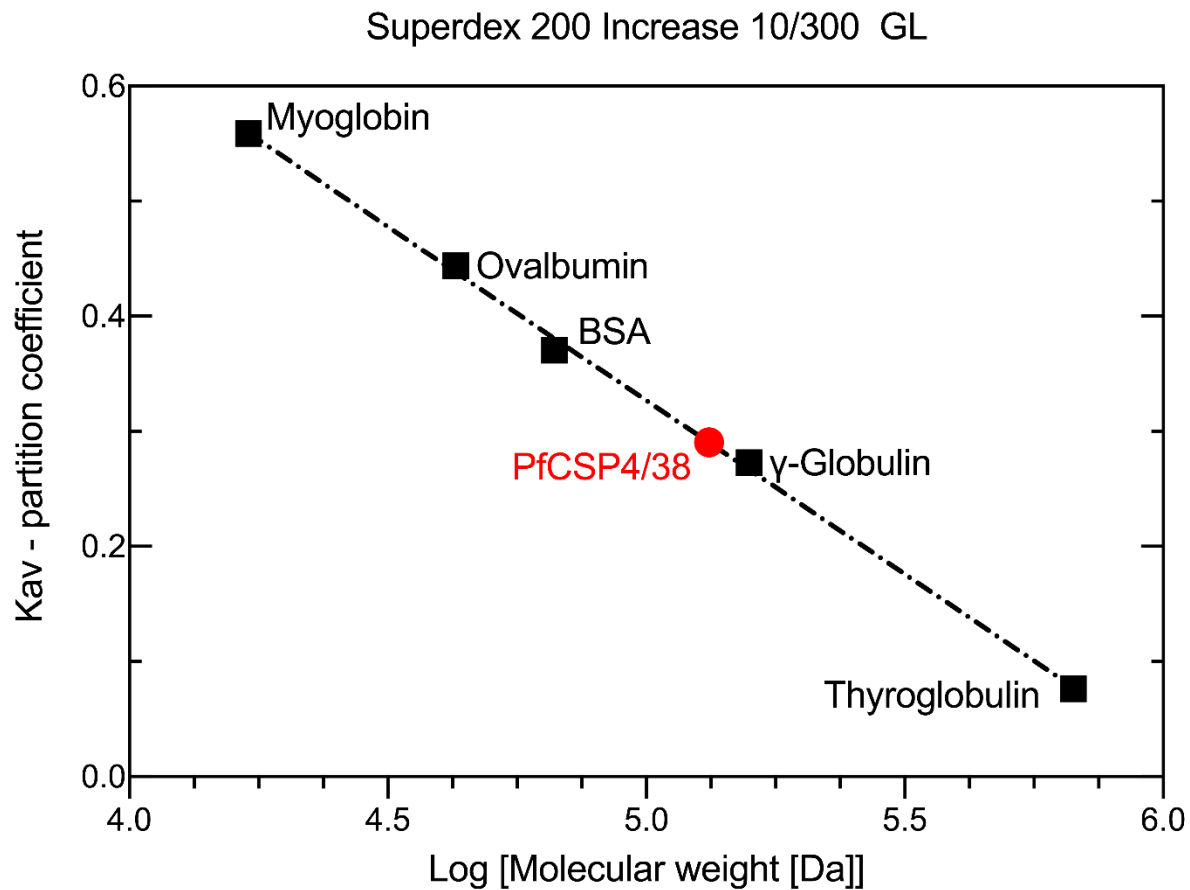

**Figure S1.** Calibration curve for some protein standards on the Superdex 200 Increase 10/300 GL column (GE Healthcare). PfCSP4/38 is an extended protein that has a retention time that compares to a  $\approx 132$  kDa globular protein.

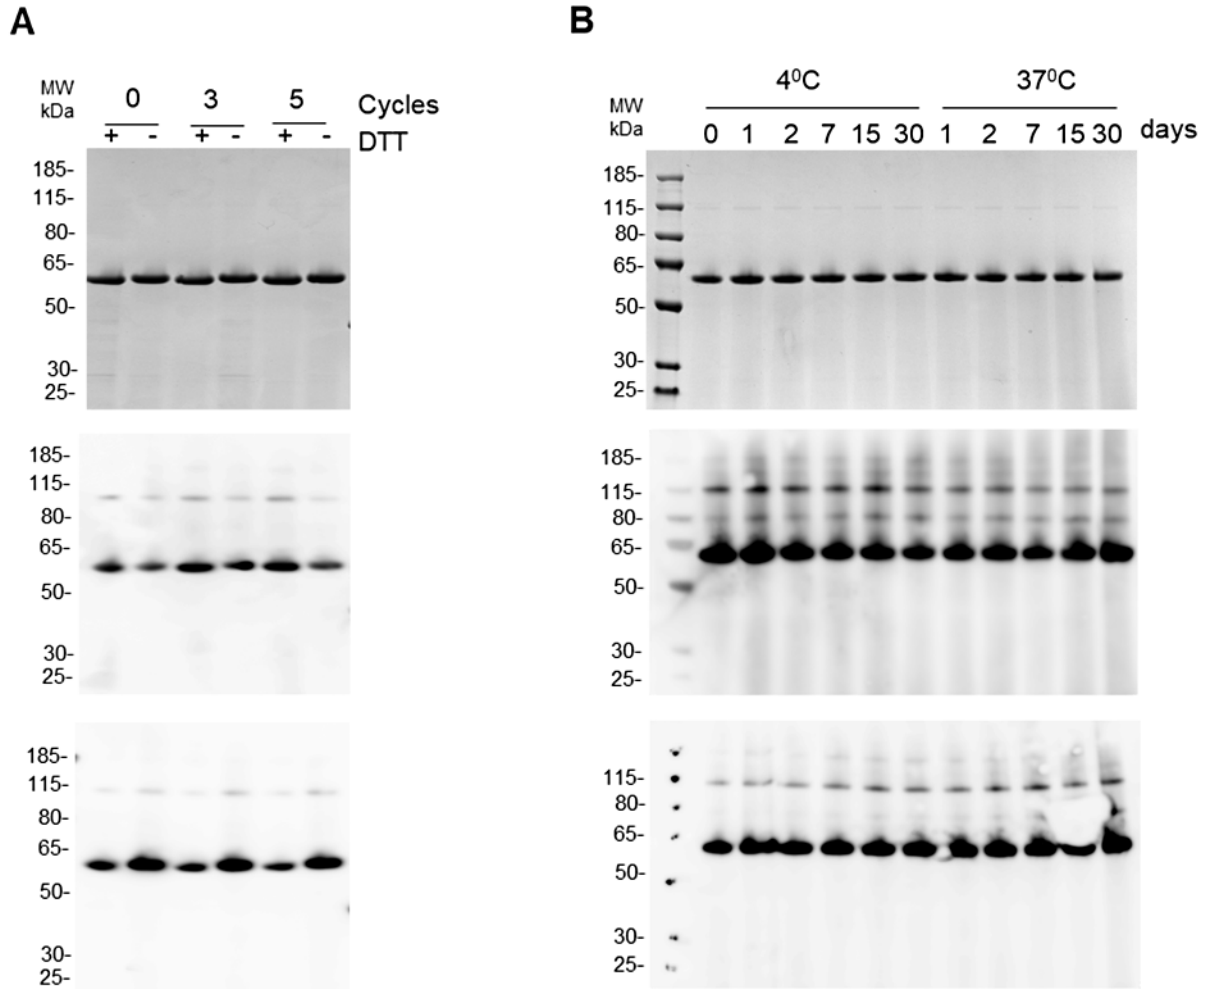

**Figure S2.** (A) Freeze/thaw stability of PfCSP4/38 after zero, three, and five cycles. (B) short-term stability of PfCSP4/38 incubated at 4°C and 30°C for 0, 1, 2, 7, 15 and 30 days. One (Coomassie) and 0.5 µg (Western blot) of PfCSP with (+) and without (-) DTT was analyzed by (Top Panel) SDS-PAGE Coomassie staining, (Middle panel) Immune-blotting using anti-His antibody and (bottoms panel) mAb 1A6. The sizes (kDa) of the molecular mass markers are indicated.

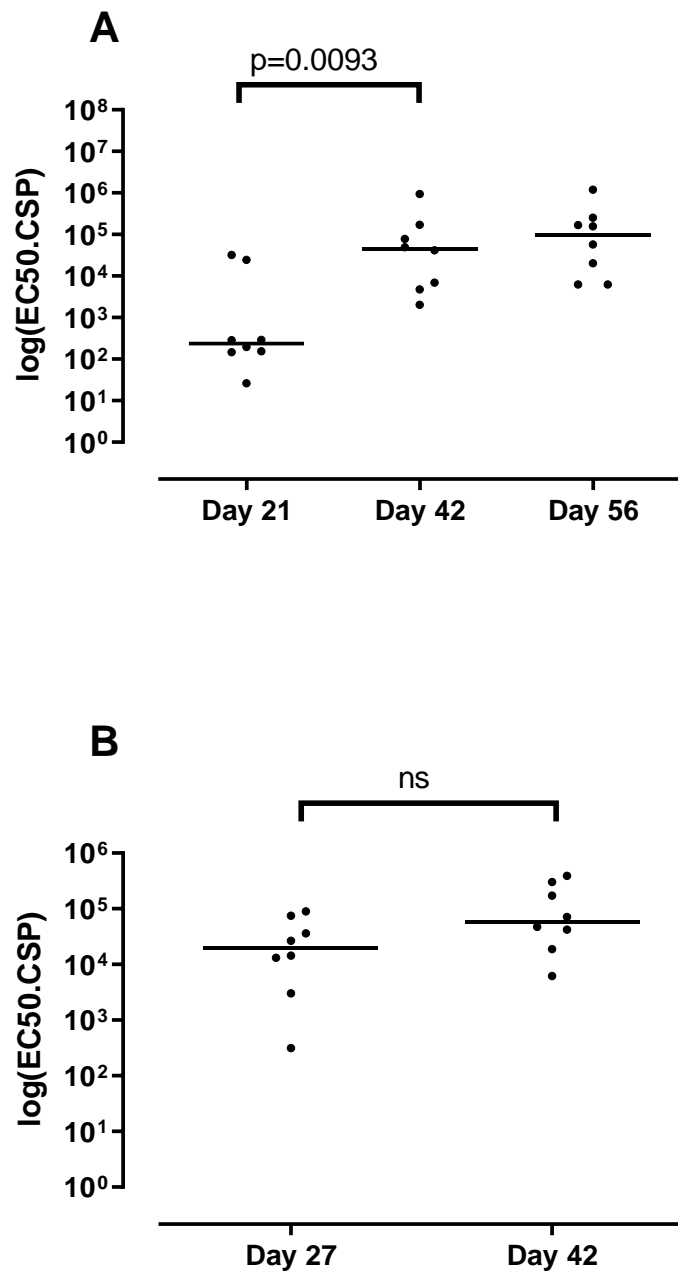

**Figure S3.** Immunogenicity of PfCSP4/38. **(A)** In a first experiment, mice (n=8) were immunized with 10 µg of purified PfCSP4/38 adjuvanted with Alhydrogel® on days 0, 21, and 42 and bled on days 21, 42 and 56. **(B)** In a second experiment, mice (n=8) were immunized with 20 µg of purified PfCSP4/38 in Montanide ISA720VG on days 0, 28 and bled on days 27 and 42. IgG antibody titres are expressed as EC50 values. Significant differences in antibody titre between days were analyzed using Mann-Whitney Rank Sum test.
